# Supplementary material for: Dual Inhibition of EGFR with Afatinib and Cetuximab in Kinase Inhibitor–Resistant EGFR -Mutant Lung Cancer with and without T790M Mutations
Source: Oxford University Press journal article supplement (doi:10.1158/2159-8290.cd-14-0326), 2014-07-29
Supplement: 21598290cd140326-sup-127662_1_supp_2509053_n6wdqj.docx [file 21598290cd140326-sup-127662_1_supp_2509053_n6wdqj.docx]

**Supplementary Table S2. Adverse events of any grade. Drug-related serious adverse events by grouped and preferred term and by highest CTCAE grade: concurrent regimen**

|  | **All Grades**  ***n* (%)** | **Grade 3**  ***n* (%)** | **Grade 4**  ***n* (%)** | **Grade 5**  ***n* (%)** |
| --- | --- | --- | --- | --- |
| Total patients treated | 126 (100) | 126 (100) | 126 (100) | 126 (100) |
| Total patients with related serious  adverse events | 17 (13) | 12 (10) | 2 (2) | 2 (12) |
| Drug hypersensitivity | 3 (2) | 3 (2) | 0 (0) | 0 (0) |
| Dehydration | 2 (2) | 2 (2) | 0 (0) | 0 (0) |
| Diarrhea | 2 (2) | 1 (1) | 0 (0) | 0 (0) |
| Fatigue | 2 (2) | 0 (0) | 1 (1) | 0 (0) |
| Nausea | 2 (2) | 2 (2) | 0 (0) | 0 (0) |
| Pneumonitis | 2 (2) | 0 (0) | 1 (1) | 1 (1) |
| Vomiting | 2 (2) | 1 (1) | 0 (0) | 0 (0) |
| Abdominal discomfort | 1 (1) | 0 (0) | 0 (0) | 0 (0) |
| Abdominal distension | 1 (1) | 1 (1) | 0 (0) | 0 (0) |
| Back pain | 1 (1) | 1 (1) | 0 (0) | 0 (0) |
| Convulsion | 1 (1) | 1 (1) | 0 (0) | 0 (0) |
| Deep vein thrombosis | 1 (1) | 1 (1) | 0 (0) | 0 (0) |
| Dyspnea | 1 (1) | 0 (0) | 0 (0) | 1 (1) |
| Gastritis | 1 (1) | 0 (0) | 0 (0) | 0 (0) |
| Headache | 1 (1) | 1 (1) | 0 (0) | 0 (0) |
| Hypersensitivity | 1 (1) | 0 (0) | 0 (0) | 0 (0) |
| Hypotension | 1 (1) | 1 (1) | 0 (0) | 0 (0) |
| Hypoxia | 1 (1) | 0 (0) | 0 (0) | 0 (0) |
| Lung infiltration | 1 (1) | 0 (0) | 1 (1) | 0 (0) |
| Aseptic meningitis | 1 (1) | 1 (1) | 0 (0) | 0 (0) |
| Peripheral edema | 1 (1) | 1 (1) | 0 (0) | 0 (0) |
| Stomatitisa | 1 (1) | 0 (0) | 0 (0) | 0 (0) |
| Syncope | 1 (1) | 1 (1) | 0 (0) | 0 (0) |

aGrouped terms.

Progression free survival (months)
